# Supplementary material for: Semimetallic superconductivity in cubic Nd3In: a first-principles insight into indium-based compounds
Source: Royal Society of Chemistry journal article supplement (doi:10.1039/d5ra05713b), 2025-01-01
Supplement: d5ra05713b1.pdf [file d5ra05713b1.pdf]

## Supplementary Material for

# **Semimetallic Superconductivity in Cubic Nd<sub>3</sub>In: A First-Principles Insight into Indium-Based Compounds**

Arafat Rahman, Alamgir Kabir, and Tareq Mahmud

*Department of Physics, University of Dhaka, Dhaka 1000, Bangladesh*

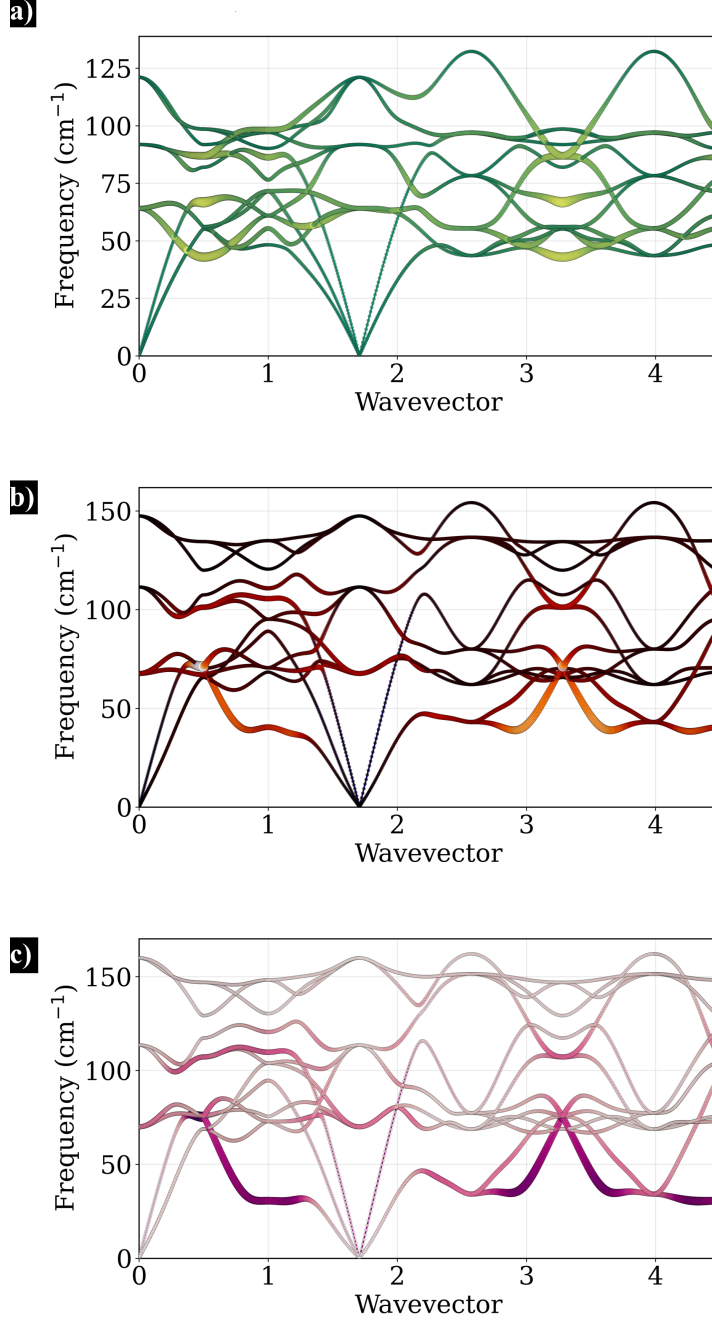

FIG. S1: Phonon dispersion relations of  $\text{Nd}_3\text{In}$  under different hydrostatic pressures. Fat bands indicate modes with strong electron-phonon coupling. (a) At ambient pressure (0 GPa), the phonon spectrum shows distinct acoustic and optical branches. (b) At 10 GPa, acoustic phonon branches soften, reflecting pressure-induced lattice changes. (c) At 15 GPa, further softening is observed in the low-frequency region. The electron-phonon coupling constant  $\lambda$  increases with pressure, suggesting enhanced superconducting interactions.

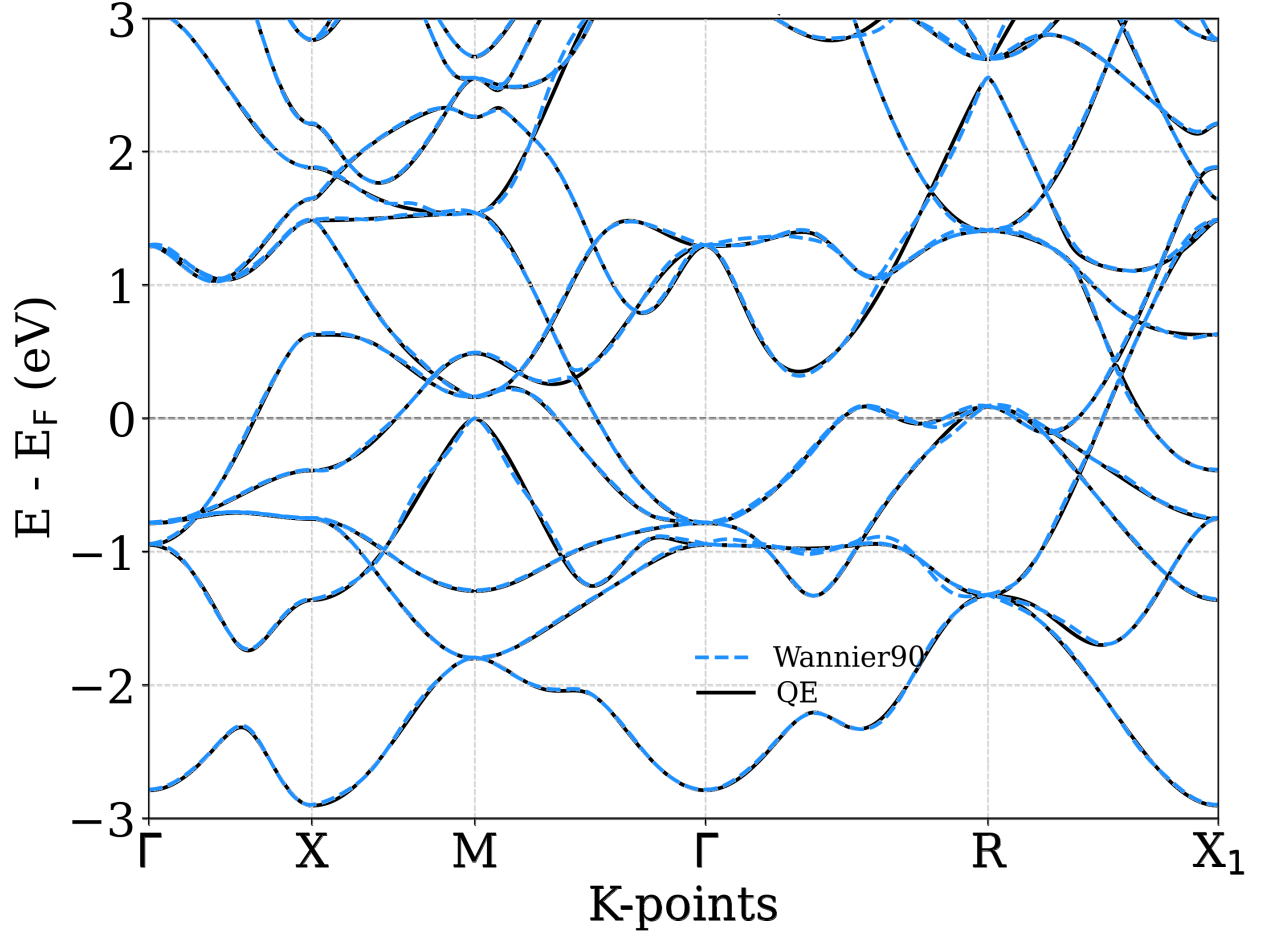

FIG. S2: Electronic band structure of Nd<sub>3</sub>In without spin-orbit coupling. The Wannier90-interpolated bands are shown as blue dashed lines; DFT bands as solid black lines.

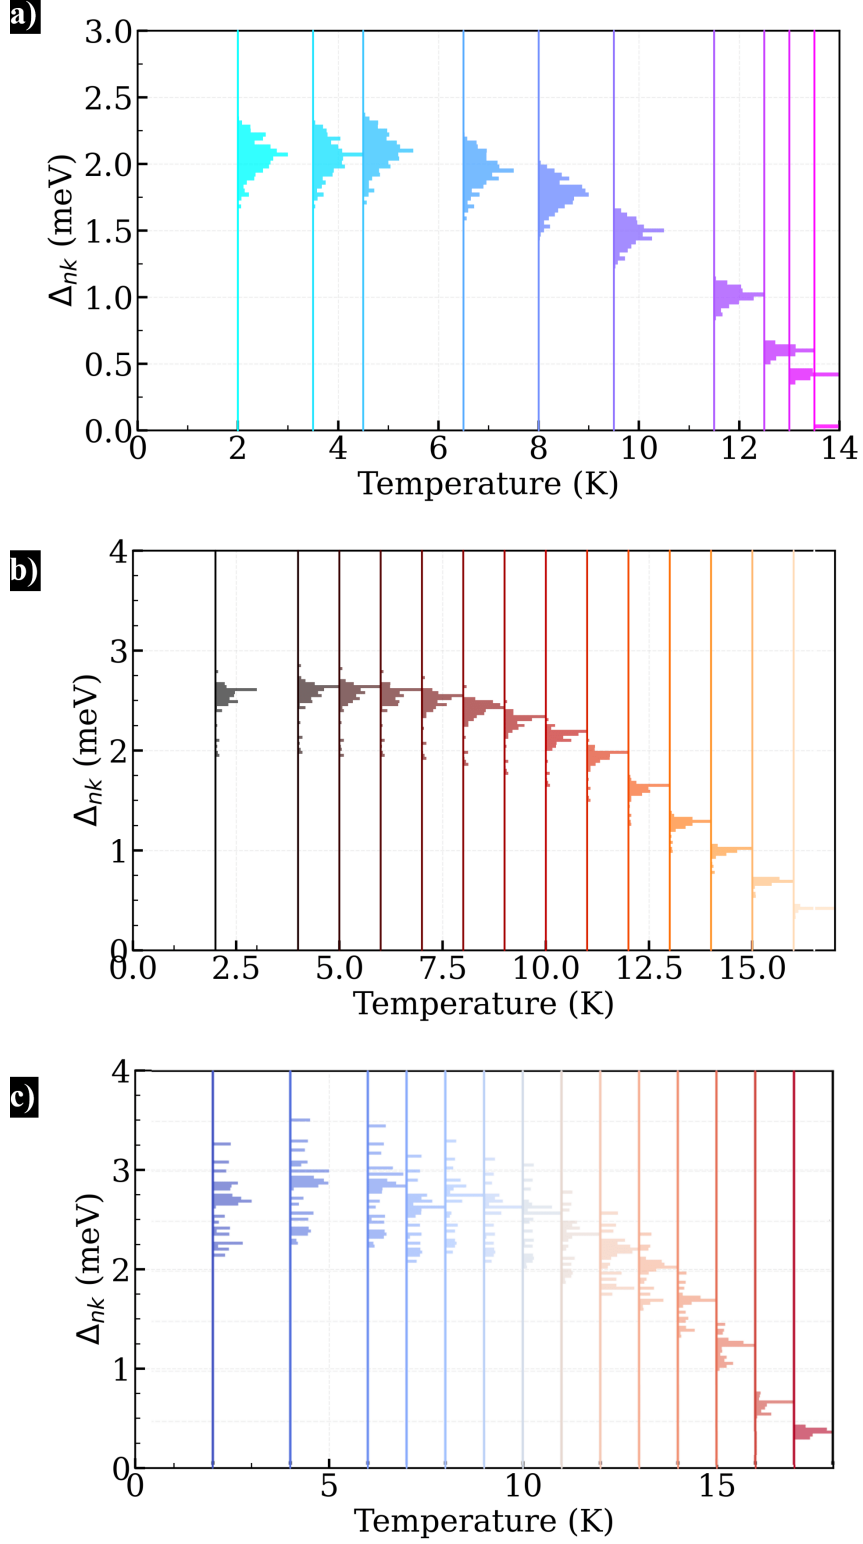

FIG. S3: Temperature dependence of the anisotropic superconducting gap on the Fermi surface of Nd<sub>3</sub>In. (a) At 0 GPa, the gap closes near 14 K. (b) At 10 GPa, it persists up to 16.5 K. (c) At 15 GPa, it remains open up to 18 K, confirming pressure-induced enhancement of  $T_c$ .

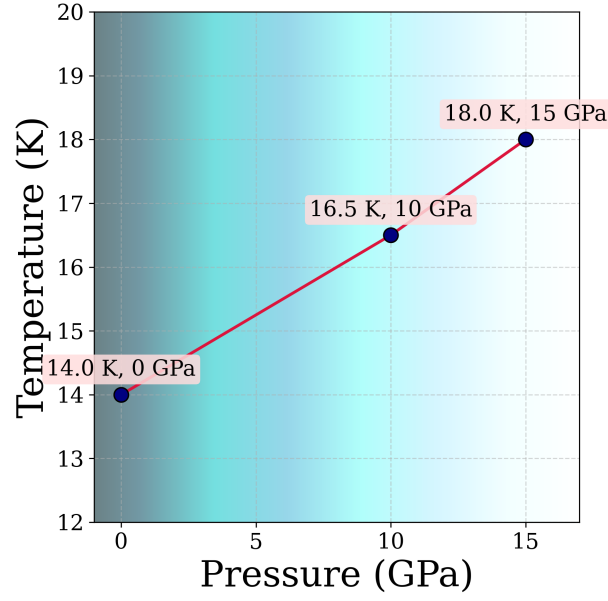

FIG. S4: Superconducting transition temperature  $T_c$  of  $\text{Nd}_3\text{In}$  at different pressures (0, 10, and 15 GPa) from anisotropic Eliashberg theory. A clear enhancement of  $T_c$  with increasing pressure is observed.

TABLE A1: Total energies of  $\text{Nd}_3\text{In}$  for different magnetic configurations.

| Magnetic Config.   | Total Energy (Ry) | Total Magnetization ( $\mu_B$ ) | $\Delta E$ w.r.t NM (Ry) | $\Delta E$ w.r.t NM (eV) |
|--------------------|-------------------|---------------------------------|--------------------------|--------------------------|
| Nonmagnetic (NM)   | -521.37877592     | 0.00                            | 0.00000                  | 0.0000                   |
| Antiferromagnetic  | -521.37823121     | 0.00                            | +0.00054471              | +0.0074                  |
| Ferromagnetic (FM) | -521.00284678     | 9.00                            | +0.37592914              | +5.11                    |

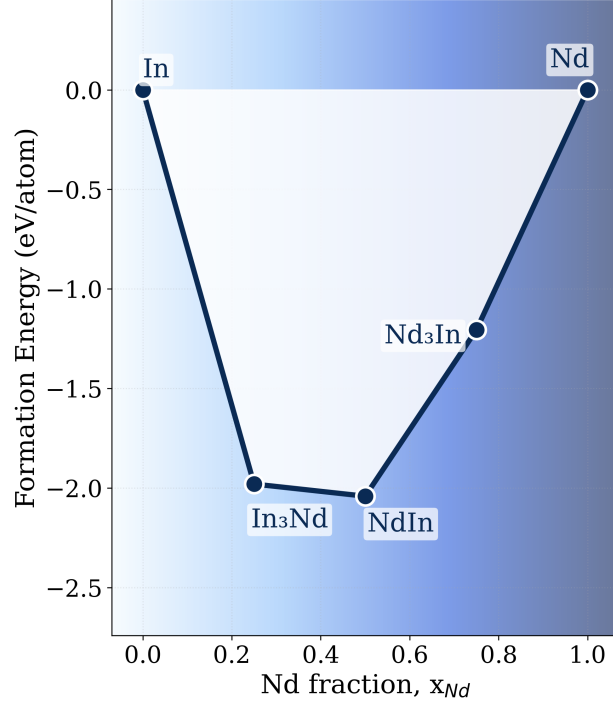

FIG. S5: Convex hull of the Nd–In binary system showing the stability of  $In_3Nd$  and  $Nd_3In$ .

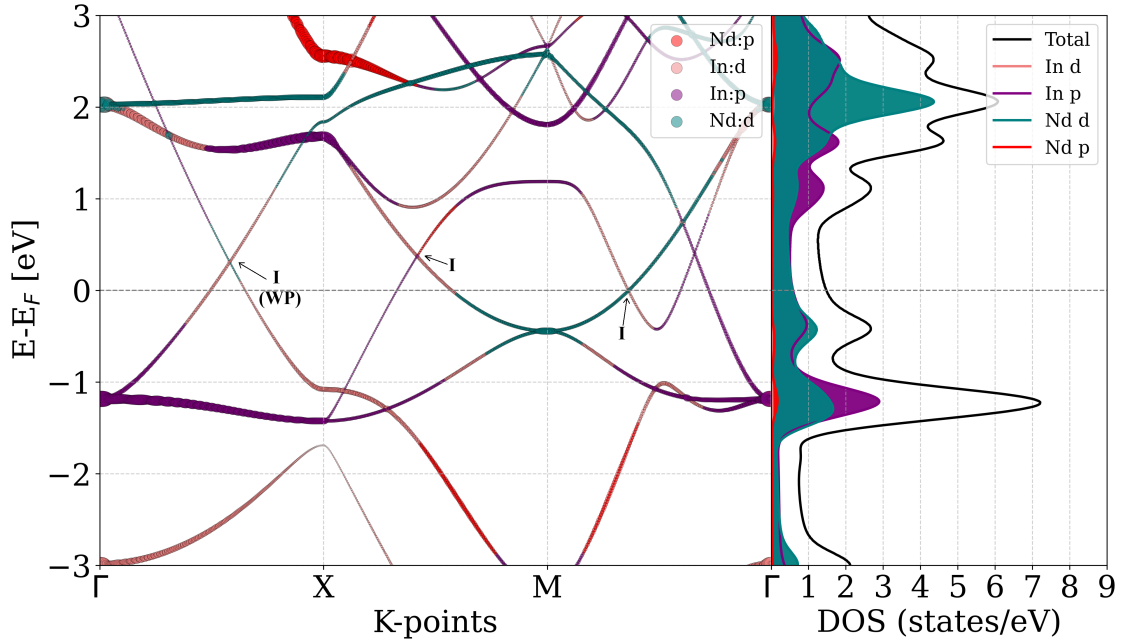

FIG. S6: Orbital-projected band structure and density of states (PDOS) for  $In_3Nd$  without spin–orbit coupling. Scatter size indicates orbital contribution. The total DOS at the Fermi level is 1.51 states/eV, indicating limited electronic states.

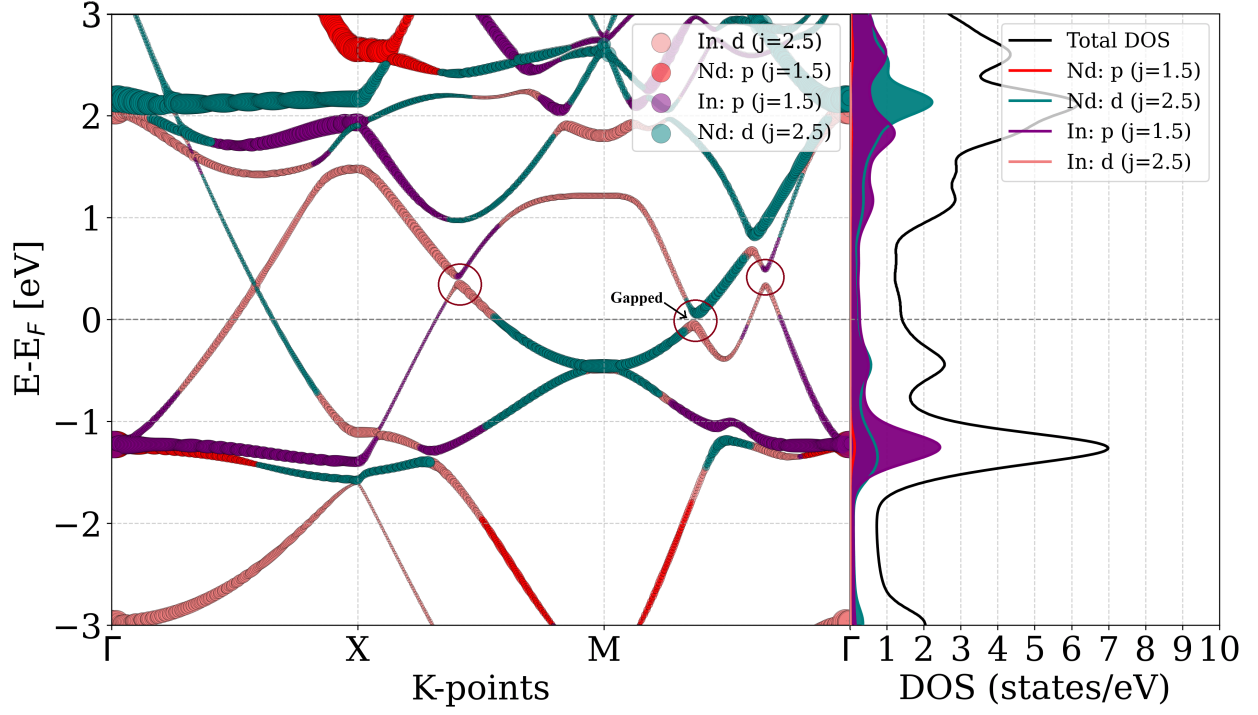

FIG. S7: Band structure and PDOS of  $\text{In}_3\text{Nd}$  with spin-orbit coupling. Orbital projections shown by scatter size. DOS at the Fermi level slightly decreases to 1.38 states/eV. Several band gaps appear due to SOC.

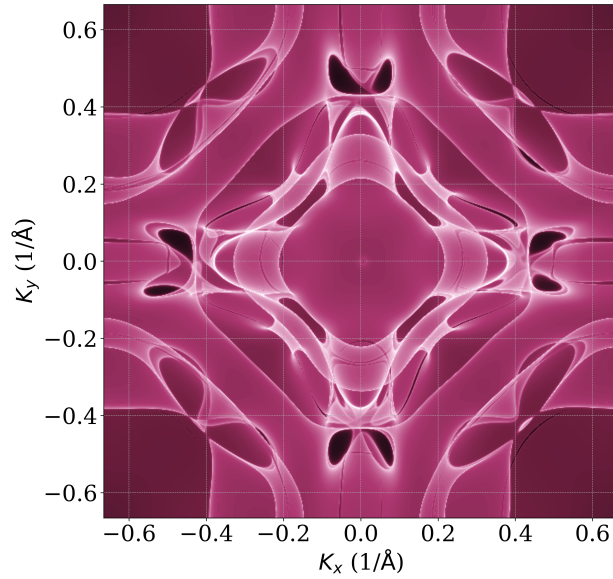

FIG. S8: Fermi arcs in  $\text{In}_3\text{Nd}$ , indicating semimetallic character.

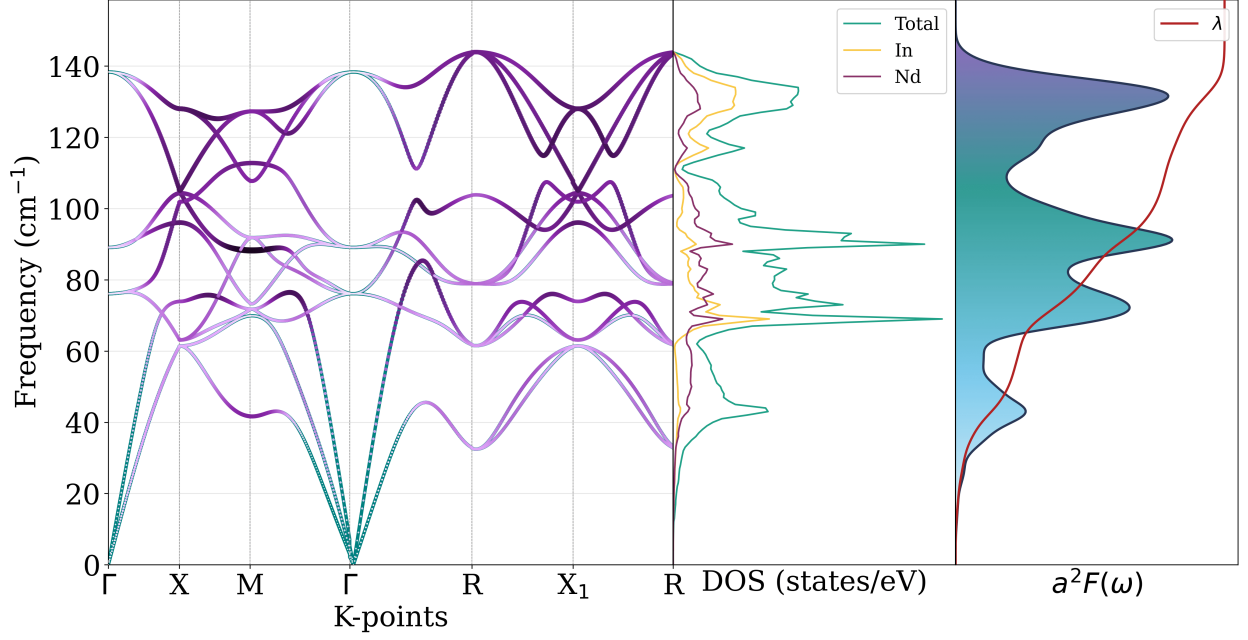

FIG. S9: Phononic and superconducting properties of  $\text{In}_3\text{Nd}$ . Left: phonon dispersion weighted by mode-resolved EPC  $\lambda_{\mathbf{q}\nu}$ . Middle: atom-projected phonon DOS. Right: Eliashberg spectral function  $\alpha^2 F(\omega)$  and integrated EPC  $\lambda(\omega)$ .
